# Supplementary material
Source: publisher figshare collection journal article supplement (https://rs.figshare.com/ndownloader/files/38731573)
Supplement: Supplementary file 1 [file 38731573]

## Sheet: data
population	area	elevation	isolation	first_mainland	second_maninland	archipelago	dev_resid
97857	118.2	134	21.9	21.9	141	CHA	366.954
62915	65	104	44.5	44.5	110	CHA	295.023
2111	8	296	15	15	89.2	CHA	-6.77556
492	5.45	104	34.5	34.5	118	CHA	-42.8486
95	2	60	40.7	40.7	115	CHA	-38.0827
2	0.3	59	37.3	37.3	120	CHA	-21.3774
0	0.243	9	21.4	21.4	88.2	CHA	-22.9833
0	0.22	14	31.3	31.3	150	CHA	-21.4113
2	0.2	64	42	42	117	CHA	-17.9863
0	0.15	14	56.6	56.6	110	CHA	-18.3246
0	0.0698	4	22.2	22.2	88.3	CHA	-14.825
0	0.0339	3.4	44.2	44.2	113	CHA	-11.2047
0	0.0323	15.9	37.2	37.2	124	CHA	-10.0381
0	0.0309	6	30.5	30.5	88.3	CHA	-10.5086
0	0.03	9.4	42.3	42.3	117	CHA	-10.072
0	0.0271	3	32.9	32.9	149	CHA	-10.37
0	0.0216	5.2	12.8	12.8	142	CHA	-9.30285
0	0.02	3	20.3	20.3	90.4	CHA	-9.26059
0	0.02	2	15.5	15.5	90.8	CHA	-9.47354
0	0.0179	6.1	35.7	35.7	118	CHA	-8.47242
0	0.0135	0.5	23.6	23.6	87.5	CHA	-8.48937
0	0.0127	3.7	18.5	18.5	92.5	CHA	-7.6806
0	0.0122	1.8	44.2	44.2	113	CHA	-7.76352
0	0.0118	0.9	12.6	12.6	141	CHA	-3.69691
0	0.0114	0.5	41.8	41.8	115	CHA	-7.89914
0	0.0107	3.7	37.1	37.1	120	CHA	-7.13098
0	0.0104	0.5	42.1	42.1	118	CHA	-7.62102
0	0.0104	0.5	16.8	16.8	89.2	CHA	-7.69678
0	0.0083	3	34.3	34.3	120	CHA	-6.53715
0	0.00825	0.5	39.4	39.4	114	CHA	-6.96859
0	0.008	1.2	15	15	90.8	CHA	-8.65986
0	0.00699	1.2	12.4	12.4	141	CHA	-6.44129
0	0.00696	1.2	16.6	16.6	89.3	CHA	-6.41093
0	0.00444	0.5	40.6	40.6	116	CHA	-3.3503
0	0.0035	24	24.5	24.5	88.9	CHA	-4.12935
0	0.002	0.5	15.3	15.3	89.6	CHA	-4.05327
0	0.0018	0.5	15.5	15.5	89.6	CHA	-3.88974
0	0.00172	1.5	12.6	12.6	141	CHA	-7.97793
0	0.00126	0.5	40.6	40.6	117	CHA	-5.47245
0	0.00096	0.5	12.5	12.5	141	CHA	-3.05171
185079	10432.5	4205	3692			HAW	-402.604
144444	1883.4	3055	3701			HAW	84.8184
953207	1545.4	1220	3711			HAW	1551.74
66921	1430.5	1598	3640			HAW	-114.78
7345	673.4	1512	3733			HAW	-261.886
3135	363.9	1026	3765			HAW	-228.538
170	180	381	3662			HAW	-216.808
0	115.5	452	3759			HAW	-184.055
40	4.52	25.9	3170			HAW	-60.2381
0	4.11	2.4	3304			HAW	-70.47
184	2.0378	10.98	3756			HAW	-36.7331
368	1.78	15.85	3749			HAW	-9.4976
0	1.5557	12	3316			HAW	-43.992
0	1.36	11.9	3168			HAW	-41.7909
0	1.13	215	3659			HAW	-31.9498
0	0.958	9.1	3177			HAW	-37.0791
0	0.69	272	3536			HAW	-25.9507
0	0.64	167	3697			HAW	-4.27605
0	0.25	110	3757			HAW	-18.5822
0	0.1829	84	3479			HAW	-16.7728
0	0.113	14	3744			HAW	-15.6615
0	0.093	50	3731			HAW	-13.3404
0	0.0619	28.04	3741			HAW	-3.76476
0	0.06	8.2	3170			HAW	-12.6826
0	0.0569	0	3749			HAW	-23.9095
0	0.053	4.6	3717			HAW	-12.4837
0	0.0506	62.8	3735			HAW	-10.3626
0	0.0489	29.9	3750			HAW	-9.04502
6	0.0461	0	3757			HAW	-11.5332
0	0.045	4	3462			HAW	-11.8143
0	0.0445	10	3758			HAW	-11.129
0	0.0442	17.98	3734			HAW	-10.6899
0	0.0376	41.2	3749			HAW	-14.4549
0	0.0316	31.1	3750			HAW	-10.7504
0	0.02	36.6	3750			HAW	-7.48641
0	0.0138	0	3749			HAW	-8.32417
0	0.0109	0	3718			HAW	-7.59397
0	0.0057	3.05	3719			HAW	-5.35562
0	0.0043	0	3718			HAW	-5.28567
0	0.0031	2.4	3697			HAW	-26.0481
0	0.0021	0	3748			HAW	-3.99769
0	0.0019	0	3716			HAW	-3.84519
0	0.0018	0	3741			HAW	-11.8354
0	0.0015	4.27	3777			HAW	-3.12585
0	0.0004	0	3718			HAW	-2.09555
30121	2300	231	15.6	15.6	163	ION	-502.621
35801	786.58	1628	34.8	34.8	238	ION	-143.513
102071	610.9	906	2.25	2.25	103	ION	-31.1111
40759	405.55	756	16.5	16.5	289	ION	-57.3331
22652	333.6	1158	0.06	0.06	223	ION	-98.2339
4041	300	506	13.5	13.5	552	ION	-230.003
3231	117.8	806	28.8	28.8	242	ION	-133.947
496	24.96	754	1.4	1.4	253	ION	-88.7519
1041	22.536	309	8.76	8.76	240	ION	-76.1054
68	20.43	365	59.6	59.6	677	ION	-95.9361
1041	19.99	277	0.6	0.6	543	ION	-73.7998
0	12.3	189	3.1	3.1	449	ION	-88.1533
392	10.08	393	36.2	36.2	86	ION	-58.1717
2	9	213	1.6	1.6	443	ION	-77.5951
80	5.901	142	6.25	6.25	257	ION	-61.7145
0	5.5	251	1.75	1.75	279	ION	-63.4649
20	5	101	17	17	173	ION	-61.9529
0	4.7	334	16.5	16.5	255	ION	-30.9842
0	4.5	260.4	44.5	44.5	234	ION	-56.735
0	4.3	136	4.75	4.75	244	ION	-59.6482
0	4.22	421	1.26	1.26	288	ION	-55.3598
496	3.65	112	26.8	26.8	93	ION	-31.3164
329	3.532	152	36	36	97	ION	-35.4001
0	3.2	128	0.11	0.11	427	ION	-54.3757
0	3	183	1.2	1.2	411	ION	-51.3458
0	2.4	137	1.5	1.5	270	ION	-47.9473
5	1.5	81	6.65	6.65	238	ION	-40.1173
0	1.23	22	49.2	49.2	364	ION	-40.4453
0	1.21	75	3.36	3.36	274	ION	-38.0274
0	1.05	141	7.85	7.85	276	ION	-34.1903
0	0.983	126	3.85	3.85	279	ION	-33.808
0	0.747	87	13.8	13.8	248	ION	-30.7722
0	0.74	62	1.78	1.78	276	ION	-31.9683
0	0.72	77	2.25	2.25	273	ION	129.997
0	0.538	48	4.4	4.4	237	ION	-28.5167
1	0.525	35	6.82	6.82	130	ION	-28.4898
0	0.352	61	3.53	3.53	271	ION	-23.8297
0	0.284	28	31	31	99	ION	-22.5999
0	0.25	21	0.75	0.75	271	ION	-22.6434
0	0.245	3	9.67	9.67	257	ION	-24.7685
0	0.174	24	3.1	3.1	270	ION	-19.3043
0	0.165	5	49.4	49.4	363	ION	-20.2912
0	0.138	27	11.1	11.1	240	ION	-17.2893
0	0.126	35	6.7	6.7	236	ION	-16.4832
0	0.114	41	4	4	272	ION	-15.7608
0	0.111	23	6.3	6.3	238	ION	-16.1444
0	0.0953	18	3.28	3.28	282	ION	-15.5534
0	0.0679	24	29	29	104	ION	-13.0851
7500	3200	1634	553	553		KUR	-574.379
2540	2053	1816	38	38		KUR	-515.633
7000	1490	1822	416	416		KUR	-403.758
0	1450	1426	684	684		KUR	-464.341
0	425	1324	187	187		KUR	-293.571
20	388	189	12.1	12.1		KUR	-333.296
0	353	1539	522	522		KUR	-267.193
2100	250	413	492	492		KUR	-223.103
0	150	2339	68.8	68.8		KUR	-190.221
0	122	944	281	281		KUR	-183.963
0	73	1172	493	493		KUR	-147.446
0	68	1157	243	243		KUR	-144.691
0	67	948	430	430		KUR	-58.1287
0	52	1446	395	395		KUR	-127.648
3	51	25	444	444		KUR	-166.853
0	49	1171	194	194		KUR	-127.564
0	30	1170	285	285		KUR	-104.927
0	21	691	640	640		KUR	-93.8441
0	16	749	650	650		KUR	-83.9284
23	15	12	426	426		KUR	-107.432
0	13	45	435	435		KUR	-94.2967
2	11.69	25	46	46		KUR	-96.3056
0	7	800	632	632		KUR	-60.563
0	7	761	138	138		KUR	-61.8117
0	6	742	308	308		KUR	-57.7919
0	5	401	462	462		KUR	-55.91
0	4.6	551	376	376		KUR	-53.0719
0	3	12	430	430		KUR	-144.925
0	2	34	444	444		KUR	-46.3356
0	0.15	42	328	328		KUR	-16.7096
0	0.1	0	222	222		KUR	-18.5835
0	0.08	11.8	424	424		KUR	-14.1819
0	0.026	2.1	456	456		KUR	-10.0874
459	277.211	620	16.0914	16.0914		NNZ	-259.717
3644	92.2427	220	5.05916	5.05916		NNZ	-131.434
295	60.1409	60	0.5342	0.5342		NNZ	-170.473
9	30.7931	720	21.4425	21.4425		NNZ	-112.172
46	23.2569	240	2.99127	2.99127		NNZ	-108.706
453	20.5655	180	1.62508	1.62508		NNZ	-92.5347
15	18.4078	220	5.76983	5.76983		NNZ	-100.487
50	17.9669	160	3.26713	3.26713		NNZ	-100.524
80	15.586	120	5.57847	5.57847		NNZ	-94.9891
3	13.2036	340	26.0309	26.0309		NNZ	-84.9298
126	7.01367	40	9.42423	9.42423		NNZ	-70.8423
13	5.2881	180	30.9898	30.9898		NNZ	-60.9479
2	3.82085	160	2.29266	2.29266		NNZ	-56.4137
3	3.3933	320	47.5516	47.5516		NNZ	-49.651
3	3.12331	200	37.6459	37.6459		NNZ	-49.7823
14	2.34585	140	3.91091	3.91091		NNZ	-45.4703
18	2.22808	100	0.751338	0.751338		NNZ	-45.8033
10	1.92231	80	3.43356	3.43356		NNZ	-44.0737
10	1.80521	60	4.35881	4.35881		NNZ	-43.7512
0	1.7381	340	7.16216	7.16216		NNZ	-39.1991
6	1.69331	200	23.1929	23.1929		NNZ	-38.8621
7	1.62192	80	1.50804	1.50804		NNZ	-41.728
23	1.59268	80	0.376615	0.376615		NNZ	-40.0848
0	1.55927	180	21.8096	21.8096		NNZ	-38.808
0	1.50564	140	11.8082	11.8082		NNZ	-39.2011
3	1.14876	120	1.40455	1.40455		NNZ	-35.7964
5	1.12476	120	3.24459	3.24459		NNZ	-34.9753
0	1.03838	200	20.6499	20.6499		NNZ	-32.9038
0	0.98941	220	14.3221	14.3221		NNZ	-32.2037
11	0.892411	60	11.7719	11.7719		NNZ	-32.2329
24	0.857467	60	3.62885	3.62885		NNZ	-30.6328
1	0.695006	120	3.16111	3.16111		NNZ	-29.4469
11	0.653516	60	1.65183	1.65183		NNZ	-28.7809
15	0.622989	60	27.0564	27.0564		NNZ	-26.8709
2	0.603734	60	1.34698	1.34698		NNZ	-29.2193
4	0.563682	100	46.7703	46.7703		NNZ	-26.1281
0	0.512048	60	3.23137	3.23137		NNZ	-27.6278
6	0.459122	100	2.28318	2.28318		NNZ	-24.4454
1	0.458366	80	26.1034	26.1034		NNZ	-25.1461
0	0.456531	160	2.52222	2.52222		NNZ	-24.7569
2	0.335742	80	2.78845	2.78845		NNZ	-22.4952
1	0.33525	60	0.892174	0.892174		NNZ	-23.3551
1	0.301037	100	0.33445	0.33445		NNZ	-21.6789
0	0.27712	60	4.34748	4.34748		NNZ	-21.6937
1	0.276743	40	3.78076	3.78076		NNZ	-22.0196
50	0.273888	60	14.0833	14.0833		NNZ	-14.2824
0	0.269168	80	2.78156	2.78156		NNZ	-21.1145
0	0.181021	40	0.389609	0.389609		NNZ	-19.176
0	0.180077	40	2.98637	2.98637		NNZ	-18.9127
0	0.171936	60	45.9428	45.9428		NNZ	-17.5802
2	0.168036	60	14.9081	14.9081		NNZ	-17.018
0	0.0961079	40	2.9072	2.9072		NNZ	-14.8121
0	0.0854298	40	5.59388	5.59388		NNZ	-14.0652
0	0.0819849	20	1.38875	1.38875		NNZ	-14.662
2	0.0718906	20	1.12454	1.12454		NNZ	-13.2299
0	0.0591486	20	0.939206	0.939206		NNZ	-12.9411
0	0.0556636	40	1.91857	1.91857		NNZ	-12.0125
0	0.0551761	100	21.534	21.534		NNZ	-10.9941
0	0.0516341	40	1.93029	1.93029		NNZ	-11.6654
0	0.0288133	20	8.28818	8.28818		NNZ	-9.60901
0	0.026973	60	0.00663308	0.00663308		NNZ	-8.91881
0	0.0250234	40	2.74641	2.74641		NNZ	-8.77308
0	0.0214249	20	0.0842601	0.0842601		NNZ	-8.76973
0	0.0213337	20	6.65195	6.65195		NNZ	-8.56587
0	0.0195572	20	8.70189	8.70189		NNZ	-8.25863
0	0.0174185	40	0.190981	0.190981		NNZ	-7.71662
0	0.0132876	20	4.68444	4.68444		NNZ	-7.14682
0	0.00769627	20	3.14828	3.14828		NNZ	-5.79764
0	0.00680388	20	0.892957	0.892957		NNZ	-5.57457
0	0.00628592	20	0	0		NNZ	-5.44396
43142	1694	1858	2715			SAM	-239.966
143418	1125	1113	2729			SAM	168.286
55876	142.3	653	2761			SAM	-9.27677
790	44.31	931	2847			SAM	-97.6193
176	7.215	491	2844			SAM	-51.8366
177	5.163	629	2847			SAM	-42.3624
889	3	99.97	2732			SAM	-3.15519
17	2.43	24.1	3058			SAM	-48.2246
476	1.517	310	2781			SAM	-5.8102
0	1.08	180	2751			SAM	-18.7813
75	1.01	165	2733			SAM	-5.72329
0	0.25	99.06	2751			SAM	-31.8788
0	0.161	91.1	2756			SAM	-15.913
0	0.15	31.2	2757			SAM	-16.6462
0	0.144	31.1	2845			SAM	-16.3813
0	0.0537	75.9	2779			SAM	-10.5041
0	0.0332	29.9	2761			SAM	215.662
0	0.021	0	2738			SAM	-9.83787
0	0.0117	0	2737			SAM	-7.83321
0	0.0105	50	2733			SAM	-23.3524
0	0.00257	99.97	2732			SAM	-9.99385
0	0.00112	0	2733			SAM	-3.14044
95000	157	905	1290			SEY	-8.10762
0	114	14	626			SEY	-236.432
7553	38	367	1296			SEY	0.520496
0	26.5	15.8	635			SEY	-132.857
160	20.1	751	1268			SEY	-83.2172
20	11.6	32	651			SEY	-90.4889
2800	10.08	333	1312			SEY	-28.797
260	9.33	21	1560			SEY	-74.0919
12	9.29	16	627			SEY	-87.3296
2	7.75	18	779			SEY	-81.2058
0	4.2	23	1152			SEY	-62.8257
100	4.03	27	1240			SEY	-28.9533
20	3.54	12.2	1154			SEY	-59.4189
7	2.93	172	1295			SEY	-46.6703
20	2.68	213	1314			SEY	-43.036
0	2.47	12.2	760			SEY	-53.4911
40	2.27	246	1300			SEY	19.5075
214	2.07	125	1335			SEY	-27.5539
152	2.01	180	1263			SEY	-29.2325
0	1.94	14	632			SEY	-48.3589
0	1.72	18.9	1151			SEY	-44.949
82	1.71	20.1	1287			SEY	-37.6393
42	1.71	3	1190			SEY	-46.2529
0	1.64	16	1116			SEY	-44.621
0	1.6	17	773			SEY	-44.2006
80	1.4	18.9	1257			SEY	-34.3201
0	1.356	24.1	1220			SEY	-40.2941
100	1.31	108	1303			SEY	-13.2339
8	1.105	20.1	1216			SEY	-36.4723
0	1.084	22.9	1194			SEY	-37.0628
0	0.96	130	1320			SEY	-31.3937
38	0.94	11.9	1212			SEY	-32.3138
2	0.78	113	1312			SEY	1.81426
0	0.762	164	1297			SEY	-28.2438
8	0.71	135	1286			SEY	-26.4095
0	0.604	131	1294			SEY	-26.2009
100	0.6	5	1298			SEY	-22.711
10	0.587	47	1299			SEY	-26.0575
0	0.581	7.62	654			SEY	-31.4013
3	0.578	17.1	1388			SEY	-28.9089
1000	0.57	5	1300			SEY	-6.29552
142	0.556	9	1243			SEY	-17.3868
0	0.523	7.6	654			SEY	-30.1456
0	0.47	13.1	1301			SEY	-27.7314
0	0.457	5.5	1240			SEY	-54.3126
0	0.423	6.1	776			SEY	-28.07
0	0.37	10	652			SEY	-25.9
0	0.361	11	631			SEY	-25.5083
0	0.35	105	1310			SEY	-21.5042
6	0.34	69	1294			SEY	-20.5592
0	0.32	3	1149			SEY	-26.0823
16	0.3	76	1294			SEY	-17.7114
0	0.293	7	629			SEY	-24.1855
100	0.29	1	1306			SEY	-15.4301
0	0.277	8	776			SEY	-23.4153
6	0.27	7	1161			SEY	-21.9924
50	0.23	90	1303			SEY	-5.40608
10	0.2	75	1306			SEY	-15.5991
2	0.194	1	1301			SEY	-21.9584
0	0.156	18.9	1195			SEY	-17.6381
10	0.136	3	1311			SEY	-16.465
2	0.1	39	1307			SEY	-13.4065
1	0.099	61	1303			SEY	-26.754
0	0.06	42	1295			SEY	-11.5154
0	0.05	4.6	1211			SEY	-12.3575
0	0.047	54	1301			SEY	-10.2933
0	0.034	10	1300			SEY	-37.926
0	0.03	4.6	1437			SEY	-10.1083
10	0.027	26	1303			SEY	-8.55888
0	0.023	30	1290			SEY	381.939
0	0.022	10	1303			SEY	-10.8635
0	0.02	30	1304			SEY	-7.67707
0	0.01	10	1300			SEY	-10.1409
2	0.01	10	1299			SEY	-5.14399
0	0.00975	7	761			SEY	-6.41067
0	0.0055	4.6	763			SEY	-5.25693
0	0.00219	6.4	763			SEY	-3.60224
0	0.00114	1.5	763			SEY	-3.0108
0	0.0009	6.4	761			SEY	-2.54762
18765	962.17	450	166	166	344	SHE	-302.072
966	212.73	205	231	231	340	SHE	-236.615
632	120.51	284	254	254	330	SHE	-49.165
61	40.59	158	245	245	328	SHE	-55.0853
368	28.15	226	196	196	345	SHE	-101.931
1061	19.73	119	219	219	335	SHE	-73.0933
130	17.43	172	210	210	361	SHE	-90.9004
38	12.85	418	172	172	400	SHE	-78.8254
15	8.22	87	201	201	377	SHE	-74.8254
68	7.49	217	124	124	389	SHE	-64.6425
776	7.15	65	182	182	360	SHE	-43.8454
76	5.19	81	183	183	359	SHE	-44.4949
0	3.87	82	208	208	361	SHE	-56.9317
0	3.38	181	201	201	343	SHE	-51.1744
0	3	30	245	245	339	SHE	-133.002
2	3	95	190	190	373	SHE	-30.4943
135	2.89	60	189	189	358	SHE	-42.5209
0	2.45	50	254	254	334	SHE	-184.469
0	2.22	90	205	205	365	SHE	-45.5657
0	1.91	55	183	183	353	SHE	-58.6505
50	1.7	38	233	233	237	SHE	-38.6859
0	1.31	52	221	221	342	SHE	-38.4817
0	1.07	32	191	191	362	SHE	-36.8078
0	1.03	44	265	265	330	SHE	-35.3673
0	0.94	34	230	230	350	SHE	-34.7824
0	0.88	29	228	228	348	SHE	-34.2664
0	0.81	38	188	188	362	SHE	-32.6516
0	0.66	26	252	252	339	SHE	-30.823
0	0.66	32	190	190	361	SHE	-50.7971
24	0.61	53	236	236	236	SHE	-25.0847
0	0.61	42	180	180	363	SHE	-29.0541
0	0.55	35	230	230	356	SHE	-28.1732
0	0.52	69	212	212	360	SHE	-26.3503
0	0.49	25	231	231	352	SHE	-27.5447
0	0.41	70	237	237	363	SHE	-23.9668
50601	214.4	335	375	375		VIR	-16.6261
9301	135	301	295	295		VIR	-73.7508
51634	69.7	474	348	348		VIR	-33.1151
23491	55.7	530	382	382		VIR	-16.1812
4170	50	389	373	373		VIR	-40.9154
285	38	8.5	412	412		VIR	-31.0097
1696	28.5	193.9	316	316		VIR	-12.4949
3930	21	403.86	410	410		VIR	-12.9092
298	8	321	374	374		VIR	-17.2116
0	3.6	88.0872	401	401		VIR	-19.1981
6	3.37	159.106	400	400		VIR	-13.7569
122	2.6	93.88	321	321		VIR	-36.1031
0	2.428	114.91	392	392		VIR	-26.7117
0	1.99	212	360	360		VIR	116.059
182	1.989	74	357	357		VIR	-46.0671
26	1.46	142.037	403	403		VIR	-24.2458
0	1.34	142.037	317	317		VIR	-6.89478
0	1.2	103.6	324	324		VIR	-34.8796
0	1.07	64.9224	327	327		VIR	-6.96225
0	1.04	113.995	405	405		VIR	-18.9504
0	0.93	147	365	365		VIR	-61.4388
0	0.93	26	364	364		VIR	107.588
0	0.85	136.855	369	369		VIR	-13.0074
0	0.709	64.9224	343	343		VIR	-34.108
9	0.67	46.0248	370	370		VIR	-22.012
0	0.53	57.912	354	354		VIR	-53.3633
4	0.477	77.7	372	372		VIR	-29.6968
1	0.3	31.0896	371	371		VIR	-31.1921
17	0.23	52	359	359		VIR	-30.2625
0	0.223	67.9704	367	367		VIR	-54.6785
0	0.215	42.0624	369	369		VIR	-20.2893
0	0.203	36.576	370	370		VIR	-28.1894
0	0.2	11.8872	366	366		VIR	267.591
0	0.175	107.899	354	354		VIR	-18.8508
0	0.17	54.864	361	361		VIR	-12.8195
0	0.148	3.048	312	312		VIR	-93.3422
0	0.122	55	352	352		VIR	-50.4218
0	0.0925	46	327	327		VIR	-19.5816
0	0.077	40	377	377		VIR	-35.0845
0	0.0718	20.1168	306	306		VIR	-38.9727
0	0.06	7.9248	398	398		VIR	-15.1265
0	0.0479	3.6576	315	315		VIR	-13.1824
0	0.0291	3.6576	326	326		VIR	-10.286
0	0.0155	0	323	323		VIR	-8.25632
0	0.0126	0	327	327		VIR	-150.991
0	0.00813	0	321	321		VIR	-8.95142
0	0.00793	0	322	322		VIR	-35.3315
0	0.00286	0	326	326		VIR	-4.6336
635595	490.4	503.5	9	9		ZHO	1368.43
111765	106.29	256.5	38.7	38.7		ZHO	458.81
59012	97.9	300.1	4.59	4.59		ZHO	238.937
37321	77.3	455.7	3.38	3.38		ZHO	158.953
53016	62.85	319	53.7	53.7		ZHO	272.793
27981	62.2	376.6	18.5	18.5		ZHO	123.477
10867	40.4	544.7	9.24	9.24		ZHO	26.7621
1750	33.19	288.5	14	14		ZHO	-82.1025
39008	22.66	217.9	46.5	46.5		ZHO	286.713
10106	22.66	192.4	26.2	26.2		ZHO	48.5037
5709	17.3	207.4	14.6	14.6		ZHO	11.8968
5676	14.5	174	13.6	13.6		ZHO	19.3168
6334	14.1	252.7	2.12	2.12		ZHO	30.9712
19750	13.18	299.6	65.4	65.4		ZHO	186.531
10337	11.7	288.2	24.7	24.7		ZHO	95.805
3066	11.1	249.1	37.3	37.3		ZHO	-3.86069
2888	7.3	150	2.34	2.34		ZHO	3.90048
3363	6.9	142.3	19.4	19.4		ZHO	16.7217
455	6.2	332.5	4.23	4.23		ZHO	-43.5073
2962	6.1	108	7.68	7.68		ZHO	11.2973
7611	5.85	199.3	75	75		ZHO	94.7725
6910	5.32	223.6	62	62		ZHO	89.6837
1087	4.9	128.2	4.86	4.86		ZHO	-22.0581
8309	4.2	213.5	82	82		ZHO	120.064
2045	3.8	159.7	8.44	8.44		ZHO	11.6357
977	3.62	236.9	67.4	67.4		ZHO	-11.0375
142	3	321.6	65.5	65.5		ZHO	-37.2467
806	2.6	136.5	61.8	61.8		ZHO	-10.4147
170	2.13	113.1	48.5	48.5		ZHO	-32.668
3374	2.1	157	10.3	10.3		ZHO	59.4991
2601	1.99	132.5	48.7	48.7		ZHO	44.677
336	1.28	105.1	61.1	61.1		ZHO	-14.6292
162	1.18	161.2	77.3	77.3		ZHO	-21.2054
227	1.12	144	65	65		ZHO	-9.24244
197	1.1	86.7	19.2	19.2		ZHO	-20.4
0	1.09	110.5	60.4	60.4		ZHO	-6.99816
0	0.85	144	41.6	41.6		ZHO	-30.8951
0	0.54	120.7	52.2	52.2		ZHO	-26.1404
184	0.49	129.2	76.8	76.8		ZHO	-7.80878
72	0.38	101.7	30.6	30.6		ZHO	-14.2959
0	0.3	89.2	97.4	97.4		ZHO	-21.0799
0	0.28	80.1	66.8	66.8		ZHO	-20.7585
0	0.25	79.4	54.4	54.4		ZHO	-19.9188
202	0.23	74.2	66.2	66.2		ZHO	-10.2236
0	0.18	67.5	66.5	66.5		ZHO	-17.6821
0	0.18	80.8	42	42		ZHO	-17.5549
0	0.12	52.6	47.5	47.5		ZHO	-15.4135
0	0.09	59.6	56.1	56.1		ZHO	-13.638
0	0.09	64.5	51	51		ZHO	-13.5792
0	0.08	69.9	76.9	76.9		ZHO	-12.8412
0	0.08	37.5	60.7	60.7		ZHO	-13.4296
0	0.08	41.2	51.4	51.4		ZHO	-13.3691
0	0.06	49.2	81.8	81.8		ZHO	-11.7489
0	0.04	28.5	79.6	79.6		ZHO	-10.4108
0	0.04	38.5	66.2	66.2		ZHO	1.09612
0	0.03	27.4	66.4	66.4		ZHO	-9.35018
0	0.03	32.7	65	65		ZHO	-16.951
0	0.03	39.5	60.5	60.5		ZHO	-9.13301
0	0.03	43.8	49.1	49.1		ZHO	-9.09038
0	0.02	35.5	67.2	67.2		ZHO	-7.84572
0	0.02	21.3	48.6	48.6		ZHO	-8.14642
0	0.01	21.5	82.3	82.3		ZHO	-6.17886
0	0.01	2.9	60.4	60.4		ZHO	-34.5203
0	0.01	22.3	51.3	51.3		ZHO	-6.19614
0	0.01	28.3	41.5	41.5		ZHO	-6.11298
0	0.01	25.9	41.1	41.1		ZHO	-6.14984

## Sheet: legend
Legend
population	number of people by islands except for NNZ (number of dwellings by islands)
area	island size (km2)
isolation	nearest landmass (km) used for global analysis
first_mainland	first nearest landmass (km) used for regional analysis
second_mainland	second nearest landmass (km) used for regional analysis
archiepelago	Channel Islands (CHA), Hawaii (HAW), Ionian Islands (ION), Kuril Islands (KUR), Northern New Zealand (NNZ), Samoa (SAM), Seychelles (SEY), Shetland (SHE), Virgin Islands (VIR), Zhoushan (ZHO)
dev_resid	deviance residuals extracted from the global GLM model
